# Supplementary material for: Regulation of hyperoxia-induced social behaviour in Pristionchus pacificus nematodes requires a novel cilia-mediated environmental input
Source: PubMed Central journal article supplement (PMC5730589; doi:10.1038/s41598-017-18019-0), 2017-12-14
Supplement: 41598_2017_18019_MOESM1_ESM.pdf [file 41598_2017_18019_MOESM1_ESM.pdf]

# Regulation of hyperoxia-induced social behaviour in *Pristionchus pacificus* nematodes requires a novel cilia-mediated environmental input

Eduardo Moreno<sup>a1</sup>, Bogdan Sieriebriennikov<sup>a</sup>, Hanh Witte<sup>a</sup>, Christian Rödelsperger<sup>a</sup>, James W. Lightfoot<sup>a</sup> & Ralf J. Sommer<sup>a1</sup>.

<sup>a</sup> Department for Integrative Evolutionary Biology, Max Planck Institute for Developmental Biology, 72076 Tübingen, Germany.

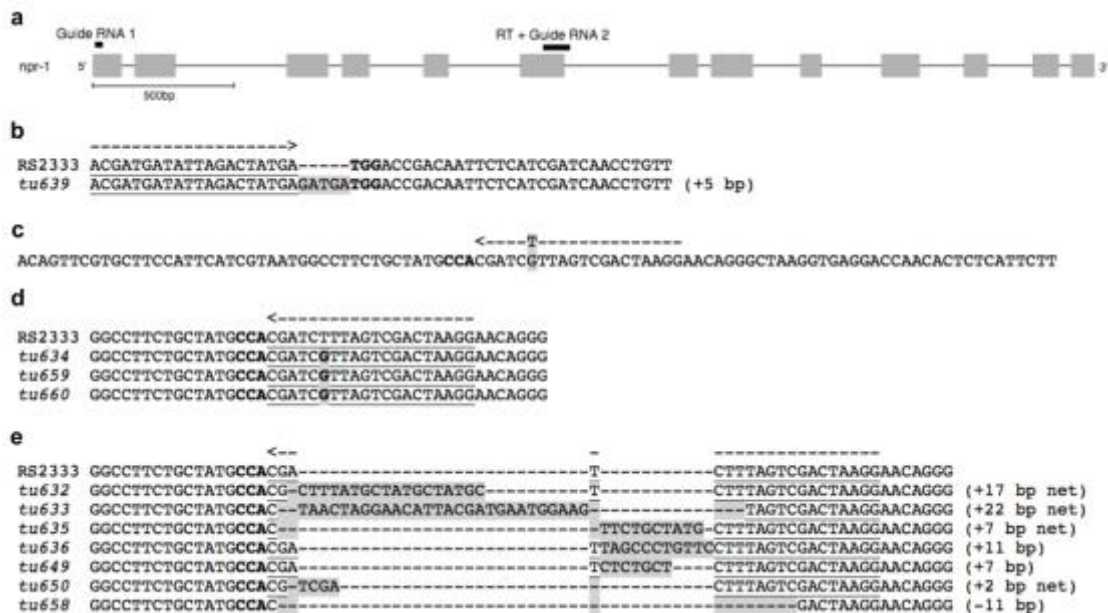

**Supplementary Figure S1.** *Ppa-npr-1* mutant alleles produced using CRISPR/Cas9 system. (a) Gene structure of the *npr-1* ortholog in *P. pacificus*. Grey boxes indicate exons and solid lines indicate introns. The positions of the sgRNA sequences and the repair-template oligonucleotide (RT) are indicated. (b) Genetic lesions in the *Ppa-npr-1* mutant allele *tu639*, generated in exon 1. (c) Repair template oligonucleotide containing a single nucleotide substitution (T->G), which induces the corresponding amino-acid substitution F->V. (d) *npr-1* gain-of-function mutant alleles. (e) Genetic lesions in *Ppa-npr-1* mutant alleles generated in exon 6. In all figures arrows indicate sgRNA sequences, the PAM domain is shown in bold and the induced genetic lesions are highlighted in grey colour.

***ifta-1***

```
RS2333 GATTCTCGACGATGACAGCAACA CACTGGCCTGCT
tu1044 GATTCTCGACGATGACAGCAACATCGTACACTGGCCTGCT (+5 bp)
tu1045 GATTCTCGACGATGACAGC-----TGGCCTGCT (-7 bp)

RS2333 CCGCTTCCCCAACGT-----CACCCTCACGTGGGCCAGTGG
tu1123 CCGCTTCCCCAACGTGGACCAA-----CCAGTGG (+8 bp net)
```

***dyf-1***

```
RS2333 GACGGAGAGTACACAAGTACAATCTATGGATTGGTGAGATTCTTTAACCATATTTT
tu1072 GACGGAGAGTACACAAGTACA----TGGATTGGTGAGATTCTTTAACCATATTTT (-5 bp)
tu1074 GACGGAGAGTACACAAGTACAACC-----ACCATATTTT (+23 bp net)
```

***che-11***

```
RS2333 GAAGCAACAGATAACAGTGCCTG-----AGATGGAAGGAG
tu1085 GAAGCAACAGATA-----TATAACAGATAAGATGGAAGGAG (+1 bp net)
tu1086 GAAGCAACAGATA-----GA-----AGATGGAAGGAG (-8 bp net)
tu1087 GAAGCAACAGATAACAGTGCCTGATGGA-----AGATGGAAGGAG (+5 bp)
```

***xbx-1***

```
RS2333 TTCAGACTAAGCAACTGTGTCACGTGTGGGAGTTG
tu1085 TTCAGACTAAGCAACTGTGTCGAG---GGGAGTTG (+3 bp net)
```

**Supplementary Figure S2.** Mutant alleles of *Ppa-ifta-1*, *Ppa-dyf-1*, *Ppa-che-11* and *Ppa-xbx-1* produced using CRISPR/Cas9 system. Arrows indicate sgRNA sequences, the PAM domain is shown in bold and the induced genetic lesions are highlighted in grey colour.

***che-3***

```
RS2333 TCATCGATATGGAGTCACACTCAA-----ACAGGTTTCGAA
tu1096 TCATCGATATGGAGTCA-----ACAGGTTTCGAA (-7 bp)
tu1097 TCATCGATATGGAGTCACAC----TTTTTCTTCAGGTT-CAGGTTTCGAA (+10 bp net)
tu1100 TCATCGATATGGAGTCACA-----TGGAGTCAA (-7 bp net)
```

***dyf-2***

```
RS2333 GGCCGCTCTGATAGTC-----GGTTTCCGCTCCGGACAGTG
tu1098 GGCCGCTCTGATAGTC-----GGTTTC--CTCCGGACAGTG (-2 bp)
tu1102 GGCCGCTCTGATAGT-TGTTGTCGTACCTGGAATC-----CTCCGGACAGTG (+10 bp ne
```

***osm-12***

```
RS2333 TGGCACAAGACAGGCAGACTGGGACTGGTTCGATC-----GCCTCA
tu1099 TGGCACAAGACAGGCAGACTGG-----TCGATCCTGGTTCGATCTGCCTCA (+5 bp net)
```

***osm-1***

```
RS2333 GACAACGTCGTGTTTCGT----GTACAAAATCGGCGCCGA
tu1129 GACAACGTCGTGTTTCGTTTTT-----AATCGGCGCCGA (-2 bp net)
```

***osm-3***

```
RS2333 ATCGCATTCAATATTCACTGTGT----ACGTGGAAGCAA
tu1090 ATCGCATTCAATATTCACTGT-----GTGGAAGCAA (-4 bp)
tu1091 ATCGCATTCAATATTCACTGTGTATTCACGTGGAAGCAA (+4 bp)
tu1092 ATCGCATTCAATATTCAC-----ACGTGGAAGCAA (-5 bp)
```

***klp-20***

```
RS2333 TCTGGAGATCAAAGAACGTCCCGATGTGGGAGTAT
tu1131 TCTGGAGATCAAAGAA-----TGTGGGAGTAT (-8 bp)
```

**Supplementary Figure S3.** Mutant alleles of *Ppa-che-3*, *Ppa-dyf-2*, *Ppa-osm-1*, *Ppa-osm-3*, *Ppa-osm-12* and *Ppa-klp-20* produced using CRISPR/Cas9 system. Arrows indicate sgRNA sequences, the PAM domain is shown in bold and the induced genetic lesions are highlighted in grey colour.

| Allele       | Mutation                        | Type of mutation | Strain |
|--------------|---------------------------------|------------------|--------|
| <i>tu634</i> | SNP : F->V                      | gain-of-function | PS312  |
| <i>tu632</i> | 1 bp deletion + 18 bp insertion | nonsense         | PS312  |
| <i>tu633</i> | 6 bp deletion + 28 bp insertion | nonsense         | PS312  |
| <i>tu635</i> | 3 bp deletion + 10 bp insertion | nonsense         | PS312  |
| <i>tu636</i> | 11 bp insertion                 | nonsense         | PS312  |
| <i>tu639</i> | 5 bp insertion                  | nonsense         | PS312  |
| <i>tu659</i> | SNP : F->V                      | gain-of-function | RSB001 |
| <i>tu660</i> | SNP : F->V                      | gain-of-function | RSB001 |
| <i>tu649</i> | 7 bp insertion                  | nonsense         | RSB001 |
| <i>tu650</i> | 2 bp deletion + 4 bp insertion  | nonsense         | RSB001 |
| <i>tu658</i> | 11 bp deletion                  | nonsense         | RSB001 |

**Supplementary Table S1.** Mutant alleles of the *npr-1* ortholog in *P. pacificus* produced using CRISPR/Cas9 system. For each allele, the length of the genetic lesion, the type of mutation and the background strain from which the mutant was produced are indicated.

| x      | y            | mean x | mean y | mean difference | t     | df | P-value <sup>1</sup> | significance |
|--------|--------------|--------|--------|-----------------|-------|----|----------------------|--------------|
| RS2333 | <i>tu634</i> | 34.83  | 23.83  | 11              | 1.61  | 18 | 0.124                | ns           |
| RS2333 | <i>tu632</i> | 34.83  | 49.16  | 14.32           | -2.30 | 18 | 0.033                | ns           |
| RS2333 | <i>tu633</i> | 34.83  | 53.00  | 18.17           | -2.73 | 18 | 0.014                | ns           |
| RS2333 | <i>tu635</i> | 34.83  | 59.67  | 24.84           | -4.13 | 18 | < 0.001              | **           |
| RS2333 | <i>tu636</i> | 34.83  | 49.66  | 14.18           | -2.39 | 18 | 0.028                | ns           |
| RS2333 | <i>tu639</i> | 34.83  | 54.5   | 19.67           | -3.21 | 18 | 0.005                | ns           |
| RSB001 | <i>tu659</i> | 86.83  | 83.00  | 3.83            | 1.50  | 18 | 0.150                | ns           |
| RSB001 | <i>tu660</i> | 86.83  | 85.17  | 1.66            | 0.67  | 18 | 0.513                | ns           |
| RSB001 | <i>tu649</i> | 86.83  | 97.5   | 10.67           | -4.64 | 18 | < 0.001              | **           |
| RSB001 | <i>tu650</i> | 86.83  | 97.16  | 10.33           | -4.35 | 18 | < 0.001              | **           |
| RSB001 | <i>tu658</i> | 86.83  | 95.67  | 8.84            | -3.60 | 18 | 0.002                | *            |

**Supplementary Table S2.** Statistical values from pairwise comparisons for mean bordering behaviour between wild-type strains and *Ppa-npr-1* CRISPR mutants. Each strain/mutant was measured 10 times. The percentage means of bordering behaviour were compared using Student's t-test.

<sup>1</sup>The alpha value, corrected for multiple comparisons via the Bonferroni method, corresponds to  $0.05/11 = 0.004$ .

| Strain | mean 20% [O <sub>2</sub> ] | mean 21% [O <sub>2</sub> ] | mean difference | t     | df | P-value <sup>1</sup> | significance |
|--------|----------------------------|----------------------------|-----------------|-------|----|----------------------|--------------|
| RS5412 | 0.003                      | 0.014                      | 0.011           | -5.02 | 10 | < 0.001              | **           |
| RS5399 | 0.008                      | 0.019                      | 0.011           | -5.73 | 10 | < 0.001              | ***          |
| RSA047 | 0.007                      | 0.019                      | 0.012           | -5.17 | 10 | < 0.001              | **           |

**Supplementary Table S3.**  $\Omega$ -turn rates in response to oxygen concentration ([O<sub>2</sub>]) shifts from 20% to 21% on food in selected *P. pacificus* solitary strains. The statistical values from pairwise comparisons between mean  $\Omega$ -turns before and after oxygen shifts were calculated with the Student's t-test.

<sup>1</sup> The alpha value, corrected for multiple comparisons via the Bonferroni method, corresponds to  $0.05/3 = 0.0167$

| x      | y     | mean x | mean y | mean difference | t      | df | P-value <sup>1</sup> | significance |
|--------|-------|--------|--------|-----------------|--------|----|----------------------|--------------|
| RS2333 | tu662 | 34.83  | 87.50  | 52.67           | -9.03  | 18 | < 0.001              | ***          |
| RS2333 | tu663 | 34.83  | 83.17  | 48.34           | -7.49  | 18 | < 0.001              | ***          |
| RS2333 | tu664 | 34.83  | 96.67  | 61.84           | -10.78 | 18 | < 0.001              | ***          |
| RS2333 | tu665 | 34.83  | 91.67  | 56.84           | -9.51  | 18 | < 0.001              | ***          |
| RS2333 | tu666 | 34.83  | 94.16  | 59.33           | -10.10 | 18 | < 0.001              | ***          |
| RS2333 | tu667 | 34.83  | 96.83  | 62.00           | -10.82 | 18 | < 0.001              | ***          |
| RS2333 | tu668 | 34.83  | 94.66  | 59.83           | -10.24 | 18 | < 0.001              | ***          |
| RS2333 | tu670 | 34.83  | 96.83  | 62.00           | -10.75 | 18 | < 0.001              | ***          |
| RS2333 | tu671 | 34.83  | 95.00  | 60.17           | -10.15 | 18 | < 0.001              | ***          |
| RS2333 | tu672 | 34.83  | 92.67  | 57.84           | -9.73  | 18 | < 0.001              | ***          |
| RS2333 | tu674 | 34.83  | 79.67  | 44.84           | -6.50  | 18 | < 0.001              | ***          |
| RS2333 | tu675 | 34.83  | 90.33  | 55.50           | -9.51  | 18 | < 0.001              | ***          |
| RS2333 | tu676 | 34.83  | 82.33  | 47.50           | -7.24  | 18 | < 0.001              | ***          |
| RS2333 | tu678 | 34.83  | 90.83  | 56.00           | -9.47  | 18 | < 0.001              | ***          |
| RS2333 | tu669 | 34.83  | 93.83  | 59.00           | -10.10 | 18 | < 0.001              | ***          |

**Supplementary Table S4.** Statistical values from pairwise comparisons for mean bordering between RS2333 and the 15 social mutants isolated in chemical mutagenesis screens. Each strain/mutant was measured 10 times. The percentage means of bordering behaviour were compared using Student's t-test.

<sup>1</sup>The alpha value, corrected for multiple comparisons via the Bonferroni method, corresponds to  $0.05/15 = 0.003$ .

| Arrow in Fig.3B | Allele       | Position Hybrid1 Assembly | Reference | Variant | Hybrid1 Gene ID   | <i>C. elegans</i> 1:2:1 ortholog | Mutation Type             | nt substitution |
|-----------------|--------------|---------------------------|-----------|---------|-------------------|----------------------------------|---------------------------|-----------------|
| 1               | <i>tu667</i> | Contig6:2446422           | A         | T       | Contig6-snap.265  | <i>ifta-1</i>                    | nonsynonym [H>L]          | CAT>CTT         |
| 2               | <i>tu667</i> | Contig6:2446427           | A         | T       | Contig6-snap.265  | <i>ifta-1</i>                    | nonsynonym [N>Y]          | AAC>TAC         |
| 3               | <i>tu666</i> | Contig6:2448984           | G         | A       | Contig6-snap.265  | <i>ifta-1</i>                    | intronic_near_splice_site | -               |
| 4               | <i>tu670</i> | Contig6:2449519           | G         | A       | Contig6-snap.265  | <i>ifta-1</i>                    | nonsense                  | TGG>TGA         |
| 5               | <i>tu669</i> | Contig6:2454188           | G         | A       | Contig6-snap.265  | <i>ifta-1</i>                    | nonsense                  | TGG>TGA         |
| 6               | <i>tu664</i> | Contig6:2460202           | G         | A       | Contig6-snap.265  | <i>ifta-1</i>                    | intronic_near_splice_site | -               |
| 7               | <i>tu665</i> | Contig31:108694           | C         | T       | Contig31-snap.23  | <i>che-11</i>                    | nonsense                  | TGG>TGA         |
| 8               | <i>tu675</i> | Contig31:107907           | C         | T       | Contig31-snap.23  | <i>che-11</i>                    | intronic_near_splice_site | -               |
| 9               | <i>tu668</i> | Contig31:107639           | G         | A       | Contig31-snap.23  | <i>che-11</i>                    | nonsense                  | CAA>TAA         |
| 10              | <i>tu663</i> | Contig10:2284105          | T         | A       | Contig10-snap.384 | <i>dyf-1</i>                     | nonsense                  | TAT>TAA         |
| 11              | <i>tu678</i> | Contig56:591220           | C         | T       | Contig56-snap.118 | <i>xbx-1</i>                     | intronic_near_splice_site | -               |
| 12              | <i>tu676</i> | Contig56:591849           | C         | T       | Contig56-snap.118 | <i>xbx-1</i>                     | nonsense                  | TGG>TAG         |

**Supplementary Table S5.** RS2333 social mutants isolated in forward genetics screens by means of EMS mutagenesis. Numbers in the first column correspond to the position of the mutation in the genes (see Fig. 2b).

| <b>Allele</b> | <b>Gene</b>   | <b>Mutation</b>                  | <b>Type of mutation</b> | <b>Strain</b> |
|---------------|---------------|----------------------------------|-------------------------|---------------|
| <i>tu1045</i> | <i>ifta-1</i> | 7 bp deletion                    | nonsense                | RS2333        |
| <i>tu1044</i> | <i>ifta-1</i> | 5 bp insertion                   | nonsense                | RS2333        |
| <i>tu1123</i> | <i>ifta-1</i> | 15 bp deletion + 7 bp insertion  | nonsense                | RS2333        |
| <i>tu1085</i> | <i>che-11</i> | 10 bp deletion + 11 bp insertion | nonsense                | RS2333        |
| <i>tu1086</i> | <i>che-11</i> | 10 bp deletion + 2 bp insertion  | nonsense                | RS2333        |
| <i>tu1087</i> | <i>che-11</i> | 5 bp insertion                   | nonsense                | RS2333        |
| <i>tu1081</i> | <i>xbx-1</i>  | 6 bp deletion + 3 bp insertion   | in frame                | RS2333        |
| <i>tu1072</i> | <i>dyf-1</i>  | 5 bp deletion                    | nonsense                | RS2333        |
| <i>tu1074</i> | <i>dyf-1</i>  | 25 bp deletion + 2 bp insertion  | nonsense                | RS2333        |

**Supplementary Table S6.** Mutant alleles of *ifta-1*, *che-11*, *dyf-1* and *xbx-1* orthologs in *P. pacificus* produced using CRISPR/Cas9 system. For each allele, the length of the genetic lesion, the type of mutation and the background strain from which the mutant was produced are indicated.



| x      | y             | mean x | mean y | mean difference | t     | df | P-value <sup>1</sup> | significance |
|--------|---------------|--------|--------|-----------------|-------|----|----------------------|--------------|
| RS2333 | <i>tu1045</i> | 34.83  | 96.11  | 61.28           | -5.68 | 11 | < 0.001              | **           |
| RS2333 | <i>tu1044</i> | 34.83  | 91.67  | 56.84           | -5.25 | 11 | < 0.001              | **           |
| RS2333 | <i>tu1123</i> | 34.83  | 96.67  | 61.84           | -5.27 | 11 | < 0.001              | **           |
| RS2333 | <i>tu1085</i> | 34.83  | 96.11  | 61.28           | -5.67 | 11 | < 0.001              | **           |
| RS2333 | <i>tu1086</i> | 34.83  | 96.11  | 61.28           | -5.69 | 11 | < 0.001              | **           |
| RS2333 | <i>tu1087</i> | 34.83  | 93.33  | 58.50           | -5.41 | 11 | < 0.001              | **           |
| RS2333 | <i>tu1081</i> | 34.83  | 96.11  | 61.28           | -5.67 | 11 | < 0.001              | **           |
| RS2333 | <i>tu1072</i> | 34.83  | 96.11  | 61.28           | -5.68 | 11 | < 0.001              | **           |
| RS2333 | <i>tu1074</i> | 34.83  | 93.33  | 58.50           | -4.41 | 11 | < 0.001              | **           |

**Supplementary Table S7.** Statistical values from pairwise comparisons for mean bordering between wild-type strains and the mutant alleles of *ifta-1*, *che-11*, *dyf-1* and *xbx-1* homologues in *P. pacificus* generated by CRISPR/Cas9 system. Each strain/mutant was measured 10 times. The percentage means of bordering behaviour were compared using Student's t-test.

<sup>1</sup>The alpha value, corrected for multiple comparisons via the Bonferroni method, corresponds to  $0.05/9 = 0.0055$ .

| <b>Allele</b> | <b>Gene</b>   | <b>Mutation</b>             | <b>Type of mutation</b> | <b>Strain</b> |
|---------------|---------------|-----------------------------|-------------------------|---------------|
| <i>tu1097</i> | <i>che-3</i>  | 4 Deletions + 14 Insertions | nonsense                | RS2333        |
| <i>tu1096</i> | <i>che-3</i>  | 7 Deletions                 | nonsense                | RS2333        |
| <i>tu1100</i> | <i>che-3</i>  | 15 Deletions + 8 Insertions | nonsense                | RS2333        |
| <i>tu1098</i> | <i>dyf-2</i>  | 2 Deletions                 | nonsense                | RS2333        |
| <i>tu1102</i> | <i>dyf-2</i>  | 9 Deletions + 19 Insertions | nonsense                | RS2333        |
| <i>tu1099</i> | <i>osm-12</i> | 6 Deletions + 11 Insertions | nonsense                | RS2333        |
| <i>tu1129</i> | <i>osm-1</i>  | 6 Deletions + 4 Insertions  | nonsense                | RS2333        |
| <i>tu1090</i> | <i>osm-3</i>  | 4 Deletions                 | nonsense                | RS2333        |
| <i>tu1091</i> | <i>osm-3</i>  | 4 Insertions                | nonsense                | RS2333        |
| <i>tu1092</i> | <i>osm-3</i>  | 5 Deletions                 | nonsense                | RS2333        |
| <i>tu1131</i> | <i>klp-20</i> | 8 Deletions                 | nonsense                | RS2333        |

**Supplementary Table S8.** Mutant alleles of *che-3*, *dyf-2*, *osm-1*, *osm-3*, *osm-12* and *klp-20* orthologs in *P. pacificus* produced using CRISPR/Cas9 system. For each allele, the length of the genetic lesion, the type of mutation and the background strain from which the mutant was produced are indicated.

| x      | y                    | mean x | mean y | mean difference | t     | df | P-value <sup>1</sup> | significance |
|--------|----------------------|--------|--------|-----------------|-------|----|----------------------|--------------|
| RS2333 | <i>tu1097</i>        | 34.83  | 95.56  | 60.73           | -5.63 | 11 | < 0.001              | **           |
| RS2333 | <i>tu1096</i>        | 34.83  | 96.67  | 61.84           | -5.75 | 11 | < 0.001              | **           |
| RS2333 | <i>tu1100</i>        | 34.83  | 95.56  | 60.73           | -5.62 | 11 | < 0.001              | **           |
| RS2333 | <i>tu1098</i>        | 34.83  | 93.33  | 58.50           | -5.40 | 11 | < 0.001              | **           |
| RS2333 | <i>tu1102</i>        | 34.83  | 95.56  | 60.73           | -5.62 | 11 | < 0.001              | **           |
| RS2333 | <i>tu1099</i>        | 34.83  | 90.56  | 55.73           | -5.14 | 11 | < 0.001              | **           |
| RS2333 | <i>tu1129</i>        | 34.83  | 93.33  | 58.50           | -5.42 | 11 | < 0.001              | **           |
| RS2333 | <i>tu1090</i>        | 34.83  | 34.44  | 0.39            | 0.03  | 11 | 0.975                | ns           |
| RS2333 | <i>tu1091</i>        | 34.83  | 25.56  | 9.27            | 0.83  | 11 | 0.424                | ns           |
| RS2333 | <i>tu1092</i>        | 34.83  | 28.89  | 5.94            | 0.52  | 11 | 0.612                | ns           |
| RS2333 | <i>tu1131</i>        | 34.83  | 33.33  | 1.50            | 0.14  | 11 | 0.895                | ns           |
| RS2333 | <i>tu1190;tu1131</i> | 34.83  | 98.33  | 63.5            | -5.90 | 11 | < 0.001              | **           |

**Supplementary Table S9.** Statistical values from pairwise comparisons for mean bordering between wild-type strains and the mutant alleles of the *che-3*, *dyf-2*, *osm-1*, *osm-3*, *osm-12*, *klp-20* homologues in *P. pacificus* generated by CRISPR/Cas9 system plus the *osm-3;klp-20* double mutant. Each strain/mutant was measured 10 times. The percentage means of bordering behaviour were compared using Student's t-test.

<sup>1</sup>The alpha value, corrected for multiple comparisons via the Bonferroni method, corresponds to  $0.05/12 = 0.002$ .

| x      | y                    | mean x | mean y | mean difference | t       | df | P-value <sup>1</sup> | significance |
|--------|----------------------|--------|--------|-----------------|---------|----|----------------------|--------------|
| RS2333 | <i>tu1100</i>        | -0.984 | -0.217 | 0.767           | -8.339  | 4  | 0.0011               | *            |
| RS2333 | <i>tu1085</i>        | -0.984 | -0.033 | 0.951           | -128.14 | 4  | < 0.001              | ***          |
| RS2333 | <i>tu1072</i>        | -0.984 | 0.062  | 1.046           | -15.231 | 4  | < 0.001              | **           |
| RS2333 | <i>tu1098</i>        | -0.984 | -0.254 | 0.730           | -23.82  | 4  | < 0.001              | ***          |
| RS2333 | <i>tu1045</i>        | -0.984 | -0.097 | 0.887           | -13.036 | 4  | < 0.001              | **           |
| RS2333 | <i>tu1131</i>        | -0.984 | -0.970 | 0.014           | -0.624  | 4  | 0.5662               | ns           |
| RS2333 | <i>tu1129</i>        | -0.984 | -0.512 | 0.472           | -4.140  | 4  | 0.0144               | ns           |
| RS2333 | <i>tu1090</i>        | -0.984 | -0.080 | 0.904           | -6.923  | 4  | 0.0023               | *            |
| RS2333 | <i>tu1099</i>        | -0.984 | -0.261 | 0.723           | -11.143 | 4  | < 0.001              | **           |
| RS2333 | <i>tu1081</i>        | -0.984 | -0.644 | 0.340           | -6.196  | 4  | 0.0035               | *            |
| RS2333 | <i>tu1190;tu1131</i> | -0.984 | -0.036 | 0.948           | -21.988 | 4  | < 0.001              | ***          |

**Supplementary Table S10.** Student's t-test results from pairwise comparisons for 1-Octanol avoidance of RS2333 and the IFT-related mutants alleles generated in this study calculated from chemotaxis indexes (see methods).

<sup>1</sup> The alpha value, corrected for multiple comparisons via the Bonferroni method, corresponds to  $0.05/11 = 0.0045$

| <b>a</b>              |                            |                            |                 |        |    |                      |              |
|-----------------------|----------------------------|----------------------------|-----------------|--------|----|----------------------|--------------|
| strain/mutant         | mean 21% [O <sub>2</sub> ] | mean 10% [O <sub>2</sub> ] | mean difference | t      | df | P-value <sup>1</sup> | significance |
| RS2333                | 31.11                      | 11.67                      | 19.44           | 2.74   | 4  | 0.052                | ns           |
| <i>ifta-1(tu1045)</i> | 97.22                      | 38.33                      | 58.89           | 9.52   | 4  | < 0.001              | **           |
| <i>che-11(tu1085)</i> | 94.36                      | 36.67                      | 57.69           | 13.32  | 4  | < 0.001              | **           |
| <i>xbx-1(tu1081)</i>  | 94.44                      | 37.78                      | 56.66           | 27.26  | 4  | < 0.001              | ***          |
| <i>dyf-1(tu1072)</i>  | 96.11                      | 34.44                      | 61.67           | 15.25  | 4  | < 0.001              | **           |
| <i>osm-3;klp-20</i>   | 85.00                      | 48.89                      | 36.11           | 11.67  | 4  | < 0.001              | **           |
| RSB001                | 87.78                      | 17.22                      | 70.56           | 7-10   | 4  | 0.002                | *            |
| <b>b</b>              |                            |                            |                 |        |    |                      |              |
| strain/mutant         | mean 10% [O <sub>2</sub> ] | mean 21% [O <sub>2</sub> ] | mean difference | t      | df | P-value <sup>1</sup> | significance |
| RS2333                | 11.67                      | 22.22                      | 10.55           | -1.14  | 4  | 0.317                | ns           |
| <i>ifta-1(tu1045)</i> | 38.33                      | 91.11                      | 52.78           | -7.66  | 4  | 0.002                | *            |
| <i>che-11(tu1085)</i> | 36.67                      | 96.11                      | 59.44           | -14.84 | 4  | < 0.001              | **           |
| <i>xbx-1(tu1081)</i>  | 37.78                      | 97.22                      | 59.44           | -37.83 | 4  | < 0.001              | ***          |
| <i>dyf-1(tu1072)</i>  | 34.44                      | 93.33                      | 58.89           | -14.29 | 4  | < 0.001              | **           |
| <i>osm-3;klp-20</i>   | 48.89                      | 95.56                      | 46.67           | -16.47 | 4  | < 0.001              | ***          |
| RSB001                | 17.22                      | 91.11                      | 73.89           | -7.44  | 4  | 0.002                | *            |

**Supplementary Table S11.** Statistical values from pairwise comparisons for mean bordering at different oxygen concentrations ([O<sub>2</sub>]) for RS2333, RSB001 and the mutant alleles of *ifta-1*, *che-11*, *dyf-1* and *xbx-1* homologues in *P. pacificus* produced using CRISPR/Cas9 system. **(a)** Oxygen shift from 21% to 10%. **(b)** Oxygen shift from 10% to 21%. The percentage means of bordering at each oxygen concentration were compared using Student's t-test.

<sup>1</sup>The alpha value, corrected for multiple comparisons via the Bonferroni method, corresponds to  $0.05/14 = 0.0036$ .

| Strain/Mutant                       | mean<br>20% [O <sub>2</sub> ] | mean<br>21% [O <sub>2</sub> ] | mean<br>difference | t      | df | P-value <sup>1</sup> | significance |
|-------------------------------------|-------------------------------|-------------------------------|--------------------|--------|----|----------------------|--------------|
| RS2333                              | 0.007                         | 0.014                         | 0.007              | -3.273 | 10 | 0.008                | *            |
| <i>che-3(tu1100)</i>                | 0.008                         | 0.018                         | 0.010              | -6.248 | 10 | < 0.001              | **           |
| <i>che-11(tu1085)</i>               | 0.010                         | 0.016                         | 0.006              | -3.288 | 10 | 0.008                | *            |
| <i>dyf-1(tu1072)</i>                | 0.006                         | 0.012                         | 0.006              | -9.495 | 10 | < 0.001              | ***          |
| <i>dyf-2(tu1098)</i>                | 0.010                         | 0.018                         | 0.008              | -3.561 | 10 | 0.005                | ns           |
| <i>ifta-1(tu1045)</i>               | 0.007                         | 0.017                         | 0.010              | -6.269 | 10 | < 0.001              | **           |
| <i>klp-20(tu1131)</i>               | 0.006                         | 0.009                         | 0.003              | -3.427 | 10 | 0.006                | ns           |
| <i>osm-1(tu1129)</i>                | 0.008                         | 0.019                         | 0.011              | -8.564 | 10 | < 0.001              | ***          |
| <i>osm-3(tu1090)</i>                | 0.008                         | 0.016                         | 0.008              | -4.772 | 10 | < 0.001              | **           |
| <i>osm-12(tu1099)</i>               | 0.005                         | 0.019                         | 0.014              | -6.116 | 10 | < 0.001              | **           |
| <i>xbx-1(tu1081)</i>                | 0.008                         | 0.018                         | 0.010              | -5.290 | 10 | < 0.001              | **           |
| <i>osm-3(tu1190);klp-20(tu1131)</i> | 0.006                         | 0.010                         | 0.004              | -3.574 | 10 | 0.005                | ns           |

**Supplementary Table S12.**  $\Omega$ -turn rates in response to oxygen concentration ([O<sub>2</sub>]) shifts from 20% to 21% on food of RS2333 and the IFT-related mutants alleles generated in this study. The statistical values from pairwise comparisons between mean  $\Omega$ -turns before and after oxygen shifts were calculated with the Student's t-test.

<sup>1</sup> The alpha value, corrected for multiple comparisons via the Bonferroni method, corresponds to  $0.05/12 = 0.0042$ .

| <b>Designation</b> | <b>Gene</b>           | <b>Strand</b> | <b>Sequence (5' to 3')</b>         |
|--------------------|-----------------------|---------------|------------------------------------|
| 15456              | <i>che-11</i>         | sense         | GAG AAC ACT TCA GGT GAG AGA C      |
| 15457              | <i>che-11</i>         | antisense     | AAA ATA TTA ATG AGT ACC TCT TGC TG |
| 15539              | <i>che-3</i>          | sense         | AGT TTA TCA GAT GCC ATC TTT AGC    |
| 15540              | <i>che-3</i>          | antisense     | GCC GCT GAG TAG ATC TGA TTG        |
| 15446              | <i>dyf-1</i>          | sense         | CAA GTT TCC TTA GCA ACG G          |
| 15447              | <i>dyf-1</i>          | antisense     | ACC GAT GGA GCT TTC TGT A          |
| 15528              | <i>dyf-2</i>          | sense         | CAG GTG TAT CAG TTC CAA TGC        |
| 15529              | <i>dyf-2</i>          | antisense     | CCA GCA GGT TTT TGT GAC A          |
| Jim265.1F3         | <i>ifta-1</i> exon 2  | sense         | GTT GGC AAT GCA AAC AAT TGC        |
| Jim265.1R5         | <i>ifta-1</i> exon 2  | antisense     | CTA GTG ATC TAG CTA TGC ATA TG     |
| Jim265.2F3         | <i>ifta-1</i> exon 15 | sense         | CCG GTT CCG GCT TCC GGA CTT G      |
| Jim265.2R5         | <i>ifta-1</i> exon 15 | antisense     | GCC AAA CGC CGT CCC AAT CAC        |
| 15559              | <i>klp-20</i>         | sense         | GAA GTG AGG GAT CTA TTG GC         |
| 15560              | <i>klp-20</i>         | antisense     | TCA GAT TTT ATG ATT GTG AAT ACT CA |
| sier0189           | <i>npr-1</i> exon 1   | sense         | TCC GTA TGC AGT CTA TAT GTA CGT GG |
| sier0190           | <i>npr-1</i> exon 1   | antisense     | CAC TCT CCA GTG CAT GGG AAC        |
| sier0239           | <i>npr-1</i> exon 6   | sense         | ACT AGA AGT CAT ACA TCC TTC C      |
| sier0238           | <i>npr-1</i> exon 6   | antisense     | TGT GCT TCA AAG TCA CGT            |
| 15549              | <i>osm-1</i>          | sense         | GTG TAA TAA CTG AGT TGA TGT CAT TG |
| 15552              | <i>osm-1</i>          | antisense     | CAA TGC CTA GCC CAA ATA G          |
| 15533              | <i>osm-12</i>         | sense         | GAG GCA TCG ACT GTT ACA CAT        |
| 15536              | <i>osm-12</i>         | antisense     | CCT TCC CGA GAA TTA CAT CC         |
| 15520              | <i>osm-3</i>          | sense         | TGC ACG TGT GTC ATA ATG TTA        |
| 15519              | <i>osm-3</i>          | antisense     | AGT TTT CGA TTG CCG TTC            |
| 15458              | <i>xbx-1</i>          | sense         | TGG AAT ATC TCT ATG CGA GG         |
| 15459              | <i>xbx-1</i>          | antisense     | TAT TGA CTG CCA CTC ACC T          |

**Supplementary Table S13.** Primers for detecting gene lesions, produced by CRISPR/Cas9 system, in this study.
